# Supplementary material for: Phase segregation via etching-induced cation migration in CoSx–ZnS nanoarchitectures for solar hydrogen evolution
Source: Royal Society of Chemistry journal article supplement (doi:10.1039/d1cy02158c), 2022-01-01
Supplement: d1cy02158c1.pdf [file d1cy02158c1.pdf]

## **Supporting Information for**

### **Phase Segregation via Etching-Induced Cation Migration in CoS<sub>x</sub>-ZnS Nanoarchitectures for Solar Hydrogen Evolution**

Zirong Shen, Junmin Huang, Junying Chen\*, Yingwei Li\*

*State Key Laboratory of Pulp and Paper Engineering, School of Chemistry and Chemical  
Engineering, South China University of Technology, Guangzhou 510640, China*

*E-mail: cejychen@scut.edu.cn; liyw@scut.edu.cn*

## EXPERIMENTAL SECTION

### Chemicals

All chemicals were purchased from commercial sources and used without further treatments unless otherwise indicated.

### Synthesis of H-ZIF-8 and $\gamma$ -ZIF-8

ZIF-8 dodecahedra were prepared first. 0.25 g of  $\text{Zn}(\text{CH}_3\text{COO})_2$  was dissolved in 5 mL of deionized (DI) water, which was added into a 5 mL aqueous solution (DI water) containing 1.12 g of 2-methylimidazole. The resulting mixture was homogenized by stirring vigorously for 1 min, followed by letting stand at room temperature for 24 h until white powders fully formed, which were collected and washed with ethanol several times, and dried at 60 °C for further use. Then the as-prepared ZIF-8 dodecahedra powder was dispersed in 10 mL DI water by ultrasonication for 15 min to form a colloidal ZIF-8 solution. For the chemical etching process, 640 mg xylenol orange sodium salt (XO) was dissolved in 40 mL DI water first. By adding a certain amount of HCl or NaOH, the pH of this etchant solution could be adjusted, e.g., pH = 2.2, 2.5, 3.0. The colloidal ZIF-8 solution was added into the etchant solution with varied pH values. Then, the resulting mixture was vigorously stirred for an optimized time to obtain  $\gamma$ -ZIF-8 with different etching degrees, where  $\gamma = 1$  (unetched), 2 (etching by a pH 3.0 XO solution for 6h), 3 (also as H-ZIF-8, etching by a pH 2.5 XO solution for 6 h), and 4 (etching by a pH 2.2 XO solution for 3 h), corresponding to unetched, low, optimal, and high etching degrees on ZIF-8. The resulting  $\gamma$ -ZIF-8 was collected via centrifugation, followed by washing with deionized water and ethanol repeatedly, and dried by vacuum at 60 °C overnight for further usage.

### Synthesis of H-ZIF-8@ZIF-67

For the heteroepitaxial growth of ZIF-67 on the  $\gamma$ -ZIF-8 particles, 10 mg of the as-formed  $\gamma$ -ZIF-8 powder was dispersed in 10 mL methanol by ultrasonication for 15 min, followed by dissolving

a certain amount of  $\text{Co}(\text{NO}_3)_2 \cdot 6\text{H}_2\text{O}$ . Next, the corresponding amount of 2-methylimidazole (8 equivalent of the cobalt salt) was dissolved in another 5 mL methanol. The above two solutions were then mixed and incubated at room temperature for 3 h under stirring. The resulting purple powders were collected via centrifugation, washed with methanol for three times, and vacuum-dried at 60 °C for 12 h to afford  $\gamma\text{-ZIF-8@ZIF-67}$ . By adjusting the amount of  $\text{Co}(\text{NO}_3)_2 \cdot 6\text{H}_2\text{O}$  (e.g., 5, 10, 15 mg), H-ZIF-8@ZIF-67-*n* products, where *n* represents the Zn/Co mole ratios in the synthesis of the layered ZIFs, could be obtained (abbreviated as H-ZIF-8@67-*n*, *n* = 2.5, 3.5, and 5, respectively).

### Synthesis of photocatalysts

In a typical synthesis, 50 mg of H-ZIF-8@ZIF-67-*n* and 100 mg of thioacetamide (TAA) were added into a mixed solution containing 28 mL ethanol and 2 mL DI water. The obtained mixture was then transferred into a 100 mL Teflon-lined stainless-steel autoclave and heated at 80 °C for 12 h after continuous stirring and ultrasonication for 10 min. The resulting powders were collected via centrifugation, washed thoroughly with ethanol, and vacuum-dried at 60 °C for 12 h to yield  $\text{CoS}_x\text{-ZnS-}n$  products, where *n* inherited from the H-ZIF-8@67-*n* precursors.

To discover the impact of etching in promoting the charge carrier mobility, another series of photocatalysts, i.e.,  $\gamma\text{-CoS}_x\text{-ZnS}$  (*y* = 1, 2, 3, and 4) were prepared by the same sulfidation treatment on the corresponding  $\gamma\text{-ZIF-8@67-3.5}$  precursors. That is,  $\text{CoS}_x\text{-ZnS-3.5}$  and 3- $\text{CoS}_x\text{-ZnS}$  are literally the same, which will not be emphasized *vide infra*. For comparison, ZnS cages, ZnS frames, and  $\text{CoS}_x$  cages were also prepared using the identical sulfidation procedures except for using pure ZIF-8 dodecahedra, H-ZIF-8, and ZIF-67 dodecahedra as the raw materials, respectively.

### Characterizations

Powder X-Ray diffraction (XRD) characterizations of the samples were carried out on a Bruker D8 ADVANCR using Cu  $K\alpha$  radiation (40 kV, 40 mA,  $\lambda = 0.1543$  nm). The BET surface area and porosity of each sample was determined by the  $\text{N}_2$  adsorption/desorption isotherms at 77 K

recorded on a Micromeritics ASAP 2020M instrument. Before the N<sub>2</sub> sorption measurements, the sample was degassed at 100 °C for 12 h. The surface morphologies of the samples were investigated using a field-emission scanning electron microscope (SEM, MERLIN of ZEISS). The morphologies and elemental distributions of the applied samples were observed by transmission electron microscopy (TEM) and high-resolution transmission electron microscopy (HRTEM) using JEOL JEM-2100F with an accelerating voltage of 200 kV. The solid-state diffuse reflectance ultraviolet-visible spectra (UV-vis DRS) were recorded between 200 and 700 nm on a HITACHI U-3010 Spectrophotometer with a BaSO<sub>4</sub> plate as a reference. Photoluminescence (PL) emission spectra were measured by using a HITACHI F-7000 spectrophotometer with an excitation wavelength of 310 nm. X-ray photoelectron spectroscopy (XPS) with a Kroatos Axis Ultra DLD system was carried out to determine the electronic states of elements. The metal contents of Zn and Co in the samples were determined quantitatively by atomic absorption spectroscopy (AAS) on a HITACHI Z-2300 instrument. The elemental contents of C, N, and S were measured by an Elementar Vario EL III equipment. ·O<sub>2</sub><sup>-</sup> and ·OH were detected by Electron Paramagnetic Resonance (EPR) on a Bruker EMXnano instrument.

### **Photoelectrochemical measurements**

All the electrochemical measurements were carried out on a CHI 760 E electrochemical system (Shanghai, China), using a typical three-electrode cell, where Pt foil and Ag/AgCl were used as the counter and reference electrode, respectively. The working electrode was prepared as follows: 20 mg of catalyst was dispersed in a mixed solution containing 990 μL ethanol, 990 μL H<sub>2</sub>O, and 20 μL 5% Nafion solution by ultrasonication for 10 min. Then, the resulting mixture was dropped on the conductive surface of FTO glass (1 cm<sup>2</sup>) and dried at 60 °C for 12 h. The transient photocurrent was measured under Xe lamp irradiation at a potential bias of 0.65 V in a 0.1 M Na<sub>2</sub>SO<sub>4</sub> aqueous solution as the electrolyte, which was filled in a quartz container with a side window. Light off and on was controlled by a baffle. Electrochemical impedance spectroscopy (EIS) measurements were carried out in an aqueous solution containing 5.0 mM K<sub>3</sub>[Fe(CN)<sub>6</sub>] and 0.1 M KCl as the electrolyte and measured over frequencies ranging from 0.1 Hz to 100 kHz with an amplitude of 5 mV. Mott-Schottky (M-S) plots were measured using the same mode with the frequencies of 1.0, 1.5, and 2.0 kHz.

## Photocatalytic hydrogen production

Photocatalytic hydrogen production experiments were carried out in a Pyrex reaction cell, which was connected with a closed gas circulation and evacuation system, as well as a low-temperature circulator to ensure a constant reaction environment (25 °C). A 300 W Xe lamp equipped with AM 1.5 G filter (MICROSOLAR300) was used as the light source to simulate solar energy and provide photons. An online gas chromatograph (GC, TECHCOMP, GC-7900) equipped with a thermal conductivity detector (TCD) and a 5 Å molecular sieve column was used to determine the content of H<sub>2</sub> evolved in the gaseous phase using high-purity argon as the carrier gas. In a typical test, 30 mg photocatalyst was suspended in a 70 mL aqueous solution containing Na<sub>2</sub>S (0.75 M) and Na<sub>2</sub>SO<sub>3</sub> (1.05 M). The reaction solution was maintained at 25 °C throughout the test. Before irradiation, the suspension was degassed under vacuum for 30 min to completely remove the dissolved oxygen and ensure the anaerobic conditions. For the evaluation of generated H<sub>2</sub>, a quantitative gas phase was injected into GC and measured by using an external H<sub>2</sub> standard calibration plot. No H<sub>2</sub> was detected in the comparison test without photocatalyst or light irradiation, implying that H<sub>2</sub> was indeed produced by the photocatalytic process.

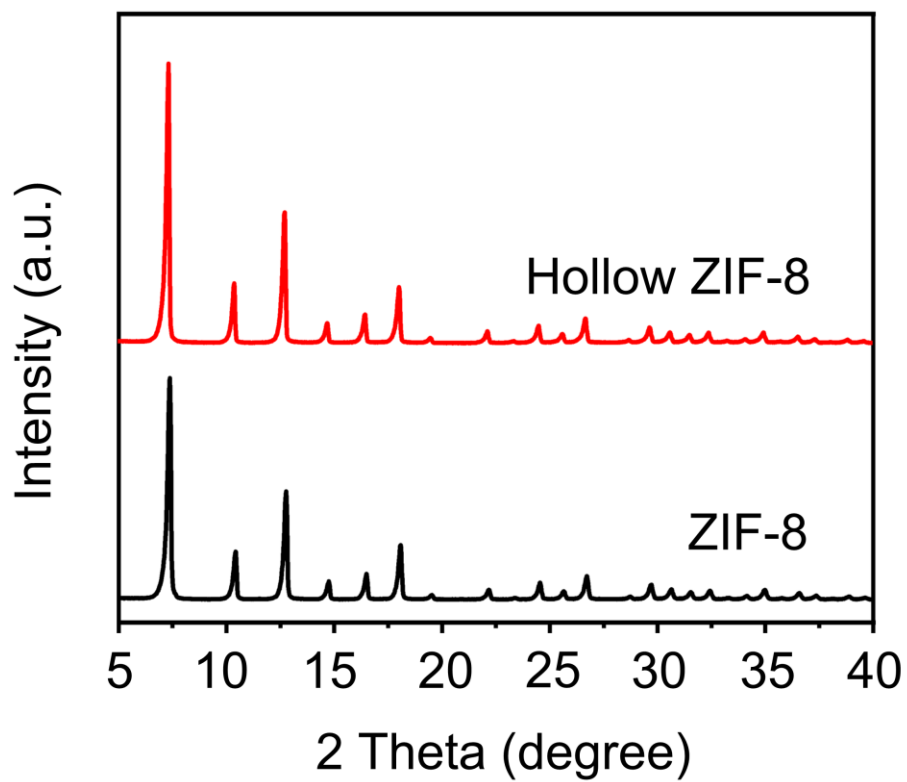

**Figure S1.** XRD patterns of H-ZIF-8 (red) and ZIF-8 (black).

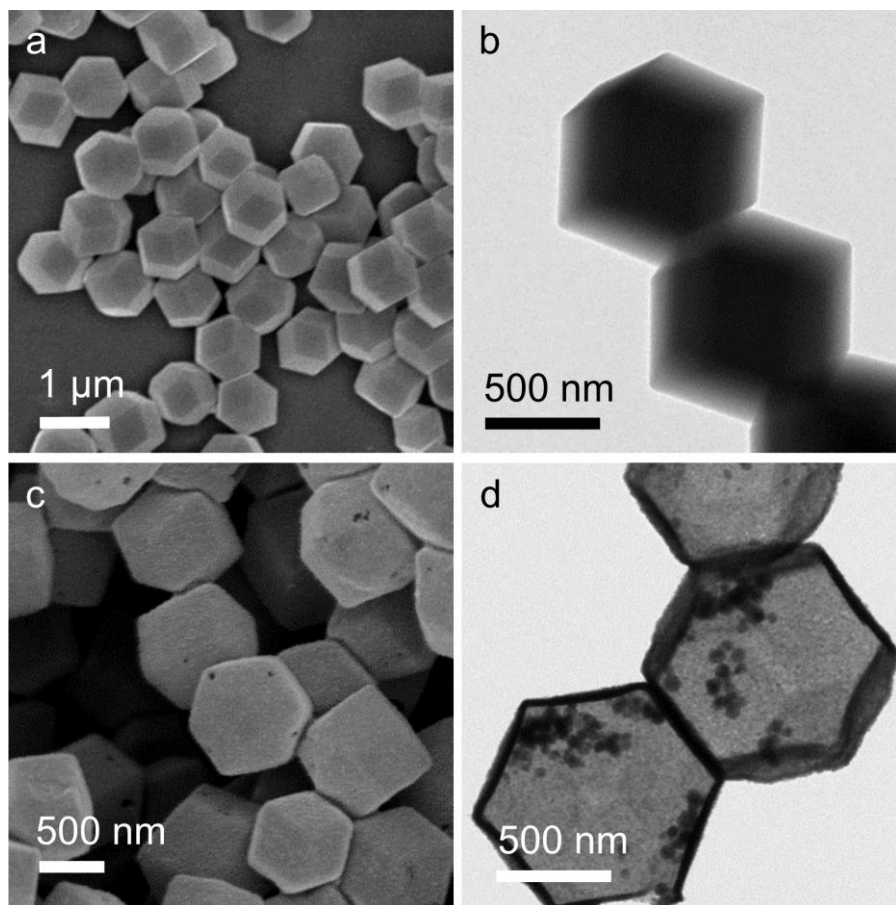

**Figure S2.** (a) SEM and (b) TEM images of ZIF-8; (c) SEM and (d) TEM images of ZnS derived from ZIF-8 dodecahedron.

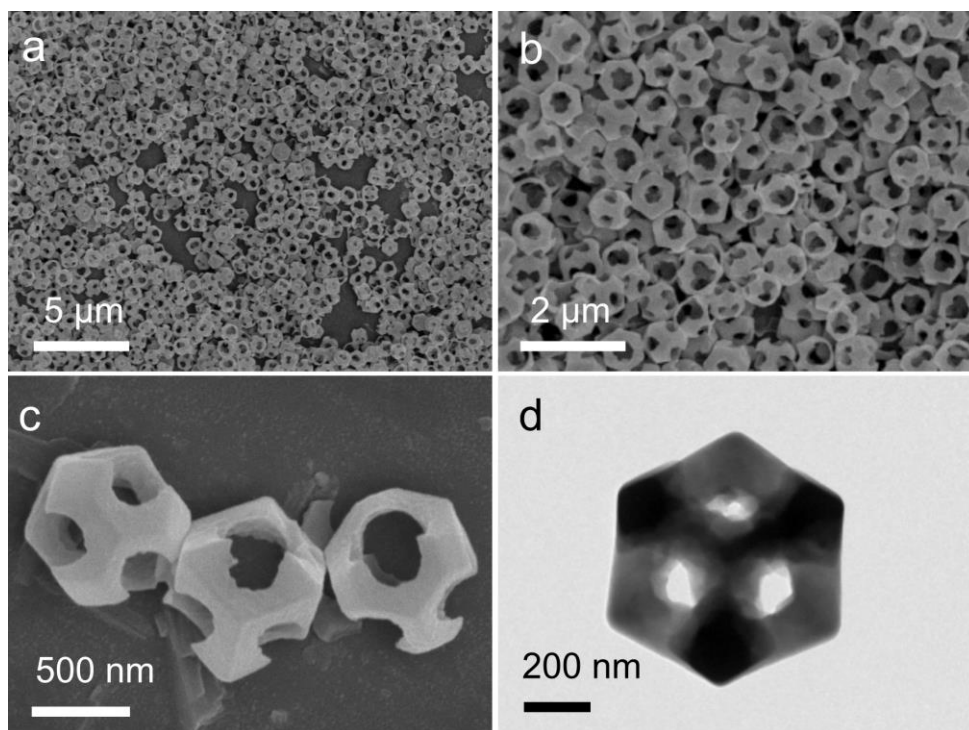

**Figure S3.** (a-c) SEM images and (d) TEM image of H-ZIF-8 (3-ZIF-8).



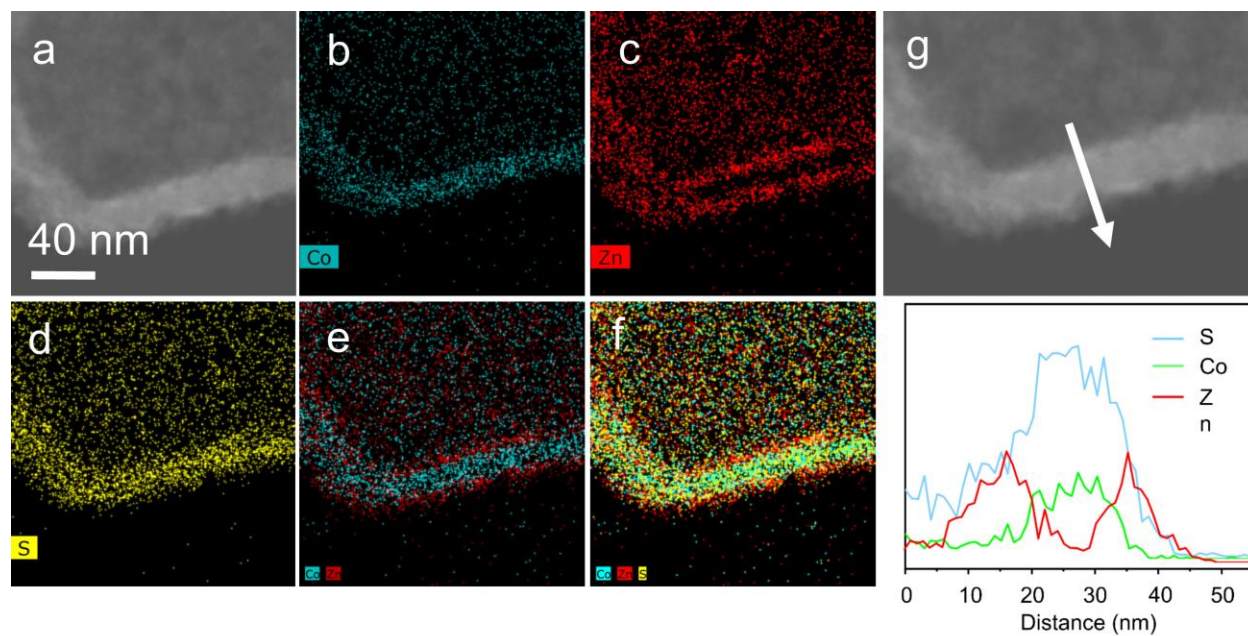

**Figure S4.** (a) HAADF-STEM, (b-f) EDX mapping and (g) elemental line scan image of the corner of the  $\text{CoS}_x\text{-ZnS}$  nanoframe.

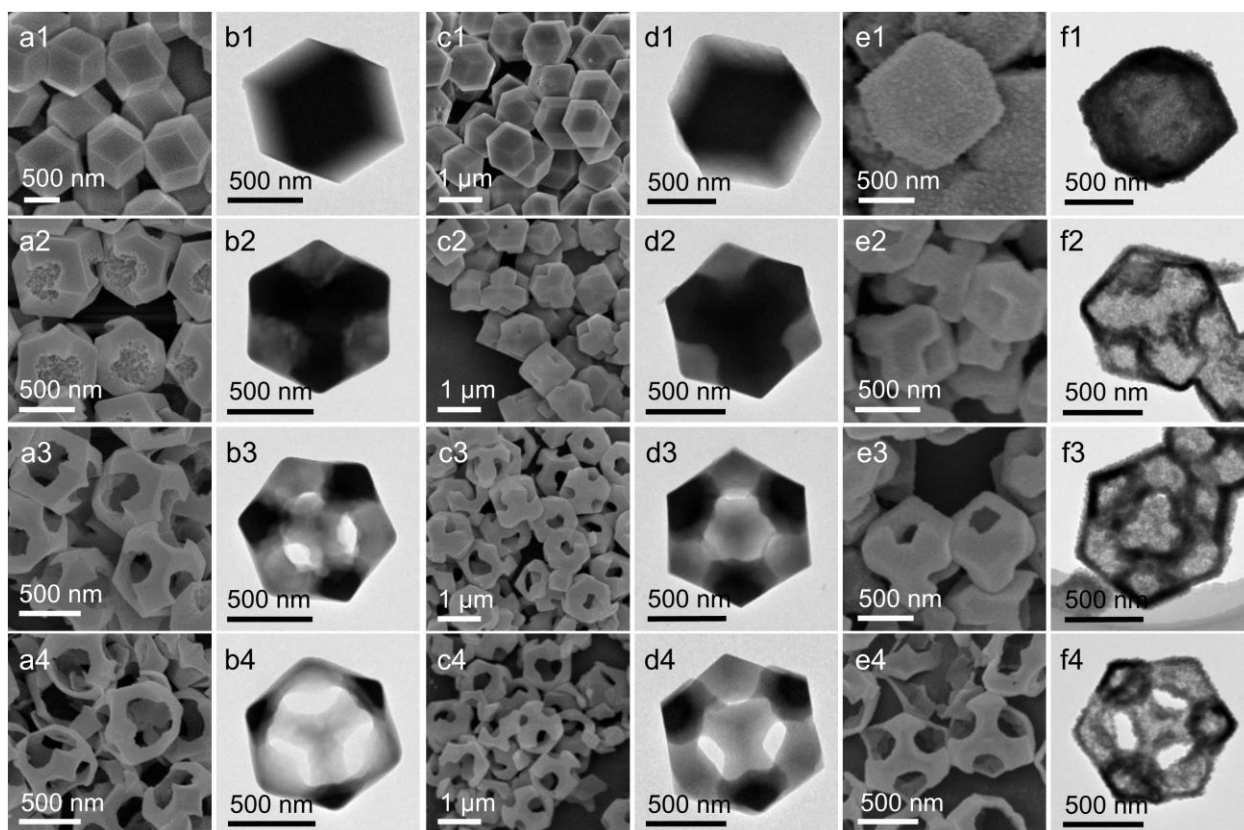

**Figure S5.** (a1-a4) SEM images and (b1-b4) TEM images of  $\gamma$ -ZIF-8 with different etching degrees; (c1-c4) SEM images and (d1-d4) TEM images of  $\gamma$ -ZIF-8@67. The Zn/Co molar ratios of  $\gamma$ -ZIF-8@67 are all about 3.5; (e1-e4) SEM images and (f1-f4) TEM images of  $\gamma$ -CoS<sub>x</sub>-ZnS.

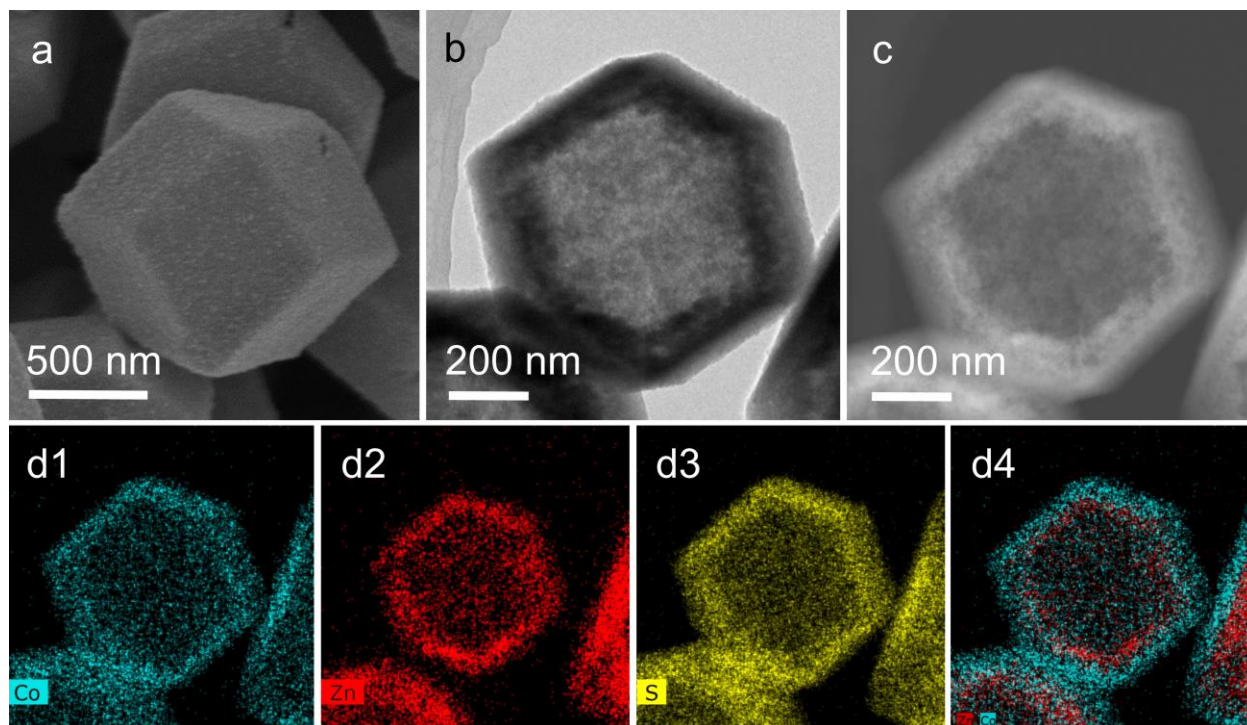

**Figure S6.** (a) SEM, (b) TEM, (c) HAADF-STEM and (d1-4) EDX mapping images of 1-CoS<sub>x</sub>-ZnS.

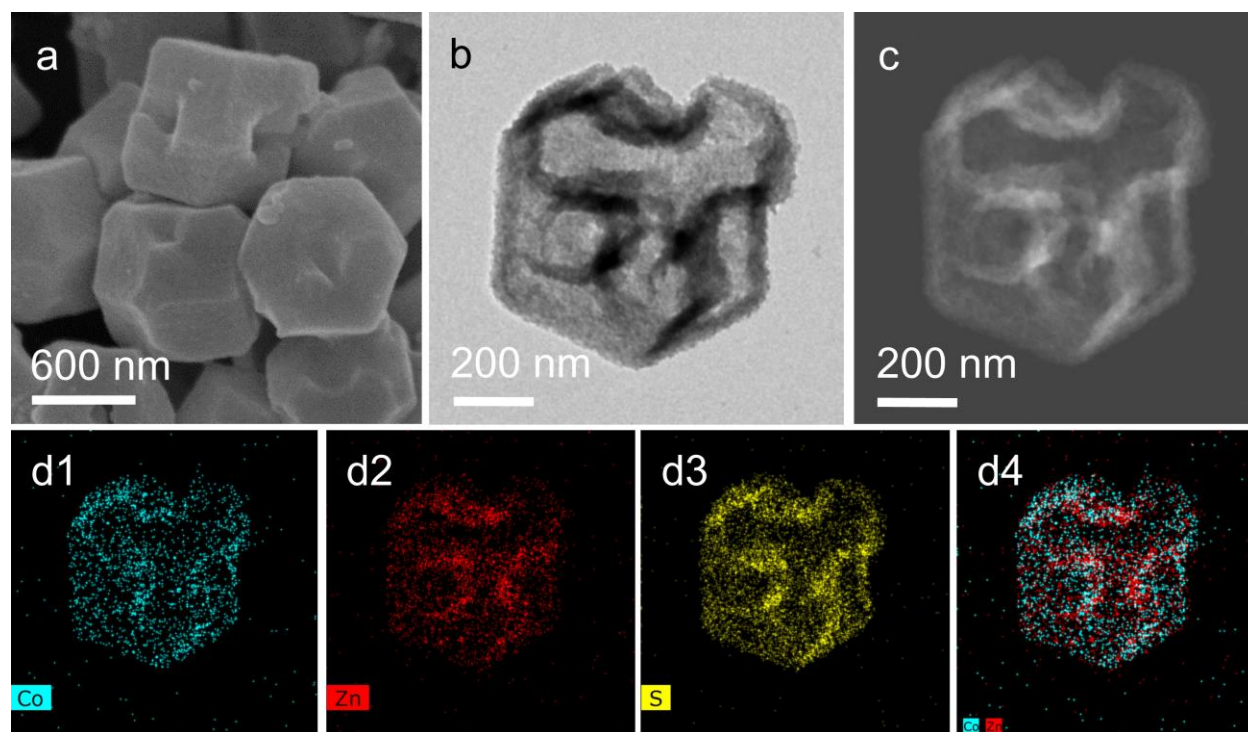

**Figure S7.** (a) SEM, (b) TEM, (c) HAADF-STEM and (d1-4) EDX mapping images of 2-CoS<sub>x</sub>-ZnS.

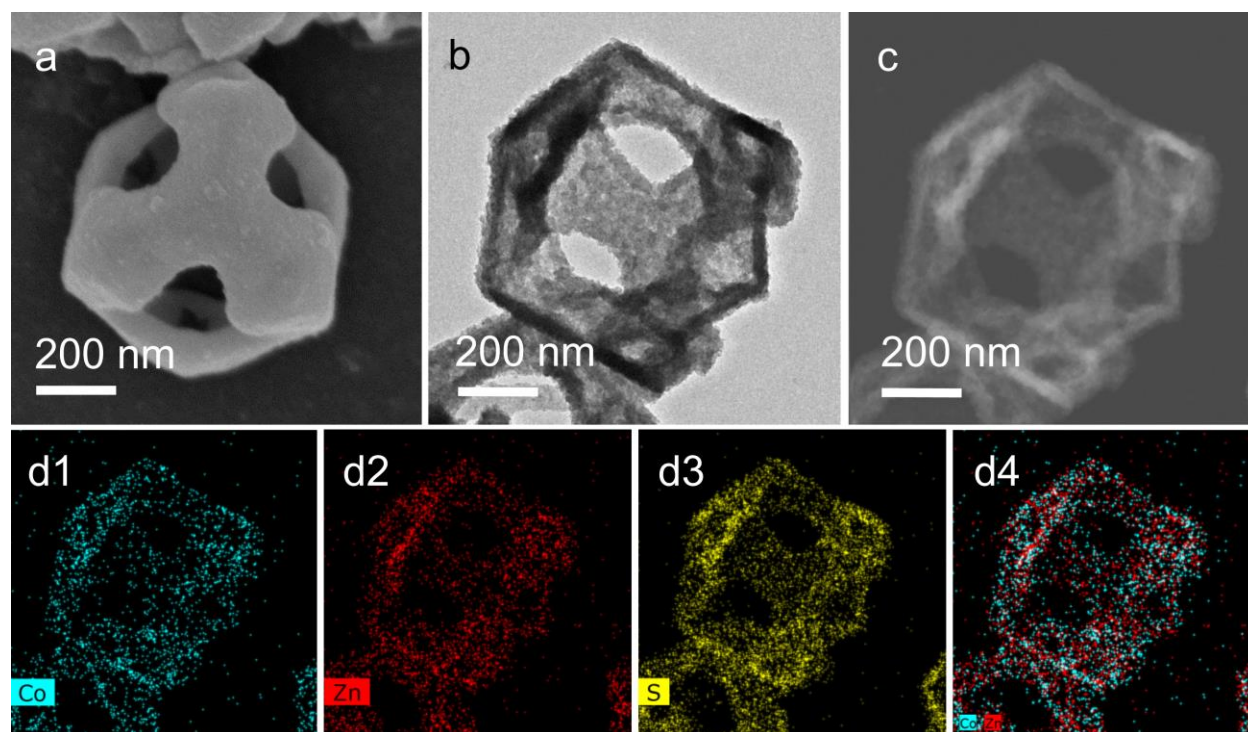

**Figure S8.** (a) SEM, (b) TEM, (c) HAADF-STEM and (d1-4) EDX mapping images of 4-CoS<sub>x</sub>-ZnS.

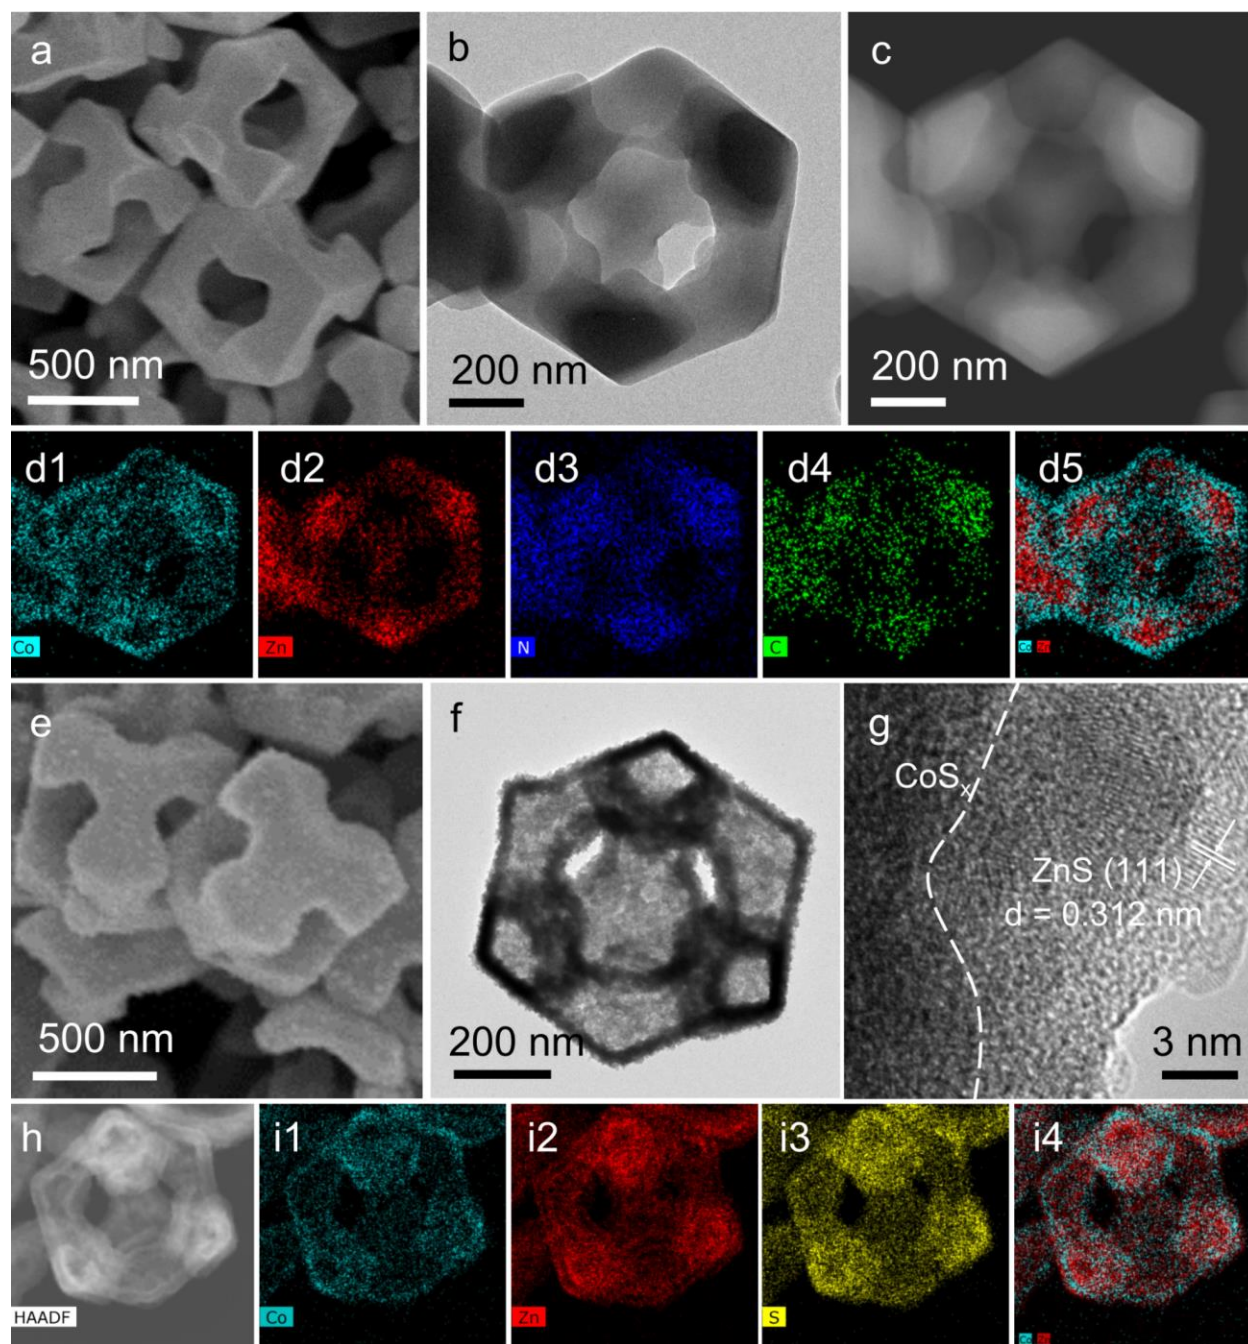

**Figure S9.** (a) SEM, (b) TEM, (c) HAADF-STEM and (d1-5) EDX mapping images of H-ZIF-8@67-5. (e) SEM, (f) TEM, (g) HRTEM, (h) HAADF-STEM and (i1-4) the EDX mapping images of  $\text{CoS}_x\text{-ZnS-5}$ .

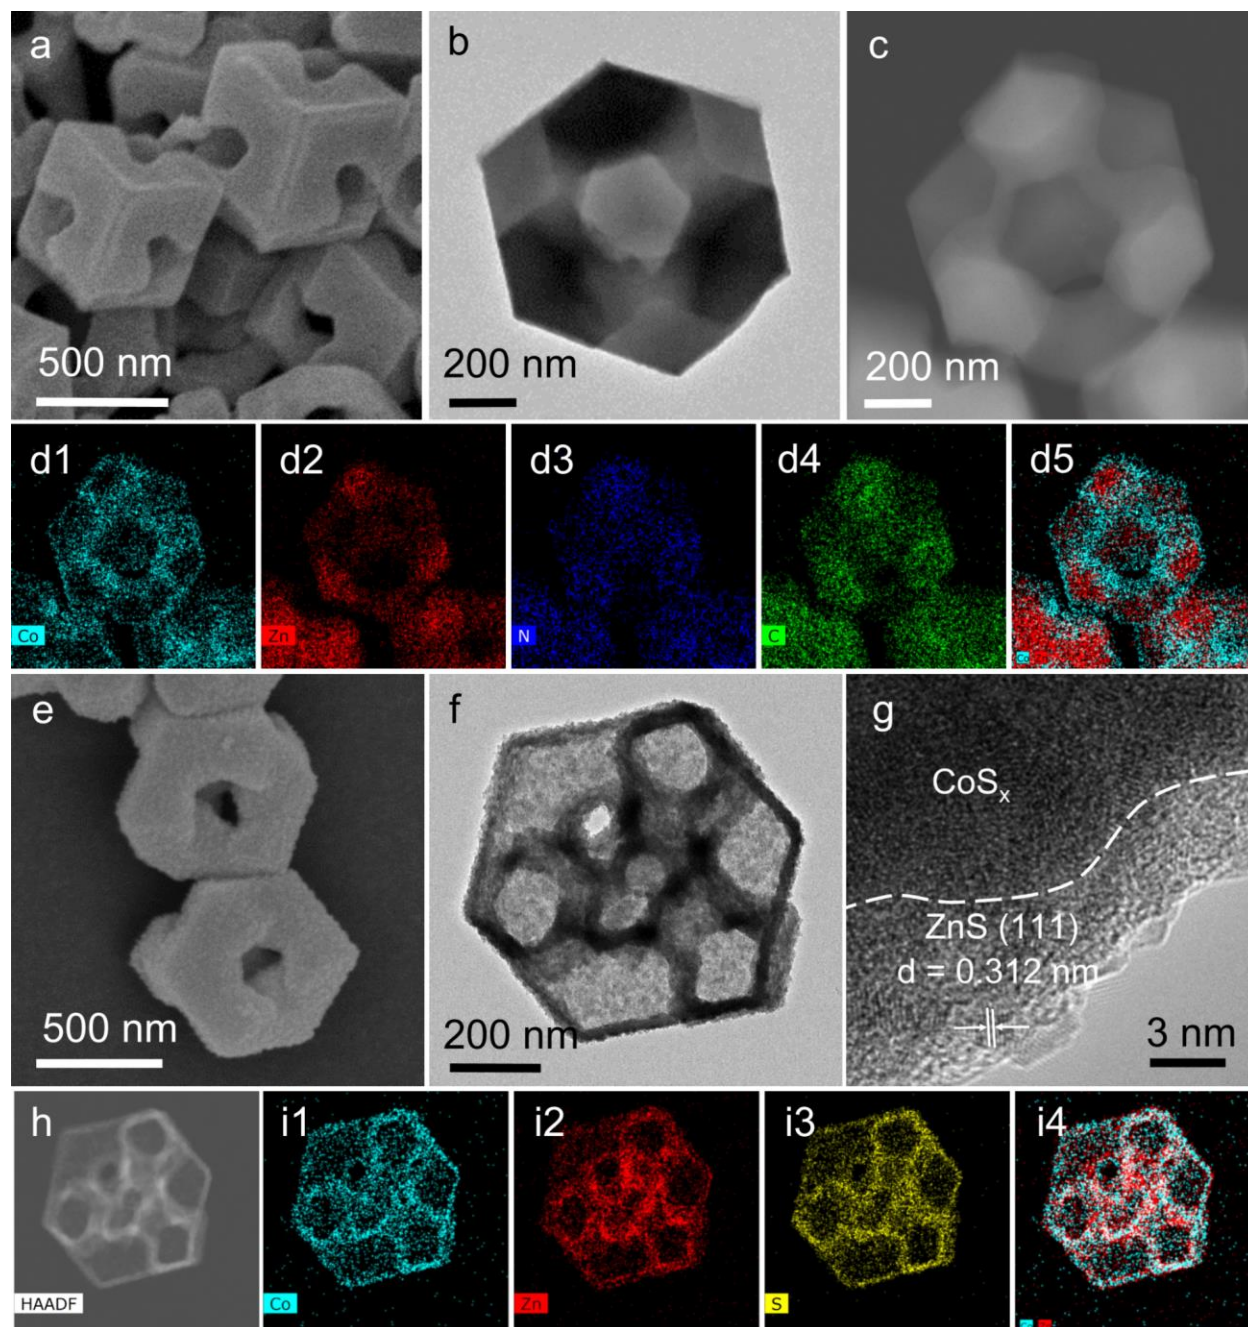

**Figure S10.** (a) SEM, (b) TEM, (c) HAADF-STEM and (d1-5) EDX mapping images of H-ZIF-8@67-2.5. (e) SEM, (f) TEM, (g) HRTEM, (h) HAADF-STEM and (i1-4) the EDX mapping images of  $\text{CoS}_x\text{-ZnS-2.5}$ .

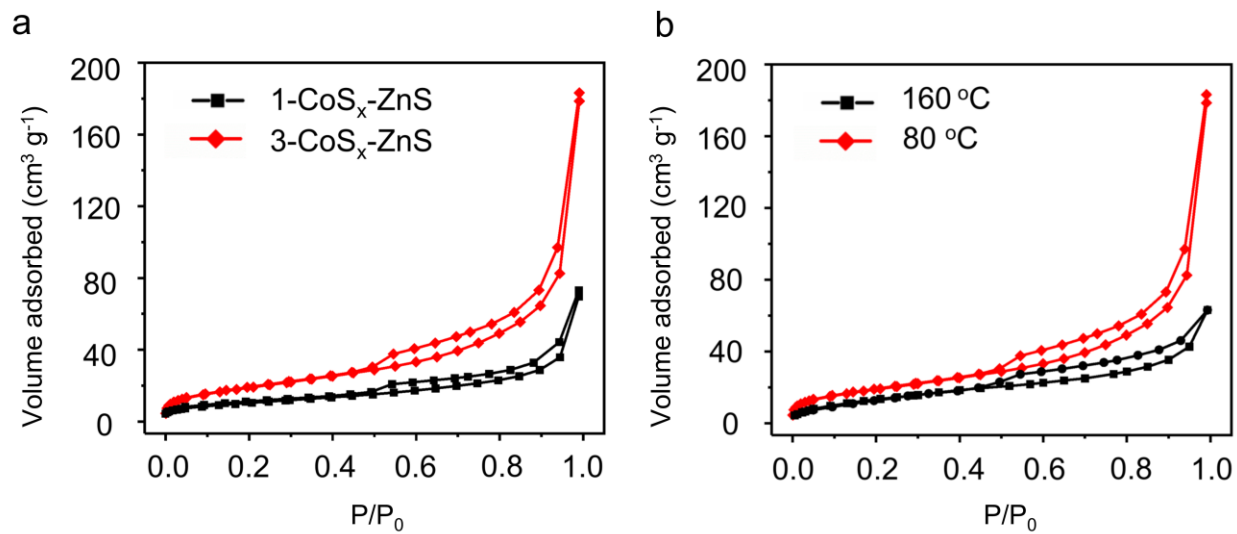

**Figure S11.** N<sub>2</sub> adsorption/desorption isotherms of (a) S-CoS<sub>x</sub>-ZnS-3.5 derived from ZIF-8@67 without etching and normal CoS<sub>x</sub>-ZnS-3.5 hollow frames, and (b) CoS<sub>x</sub>-ZnS-3.5 hollow frames prepared by the sulfidation process at varied temperatures.



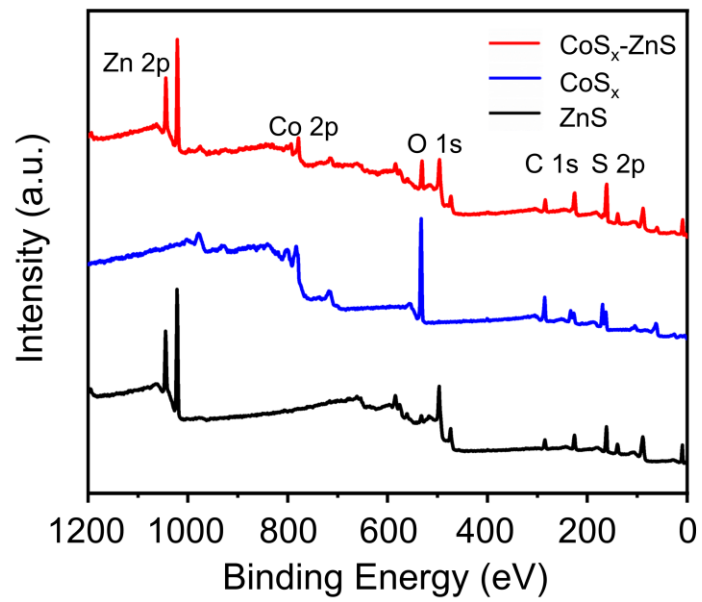

**Figure S12.** XPS survey spectra of ZnS, CoS<sub>x</sub> and CoS<sub>x</sub>-ZnS-3.5.

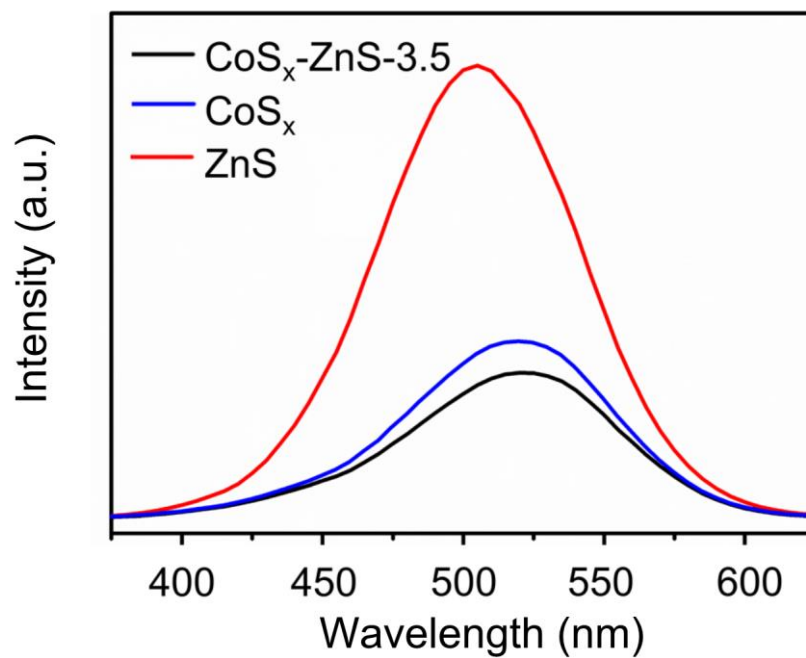

**Figure S13.** Photoluminescence spectra of ZnS, CoS<sub>x</sub> and CoS<sub>x</sub>-ZnS-3.5.

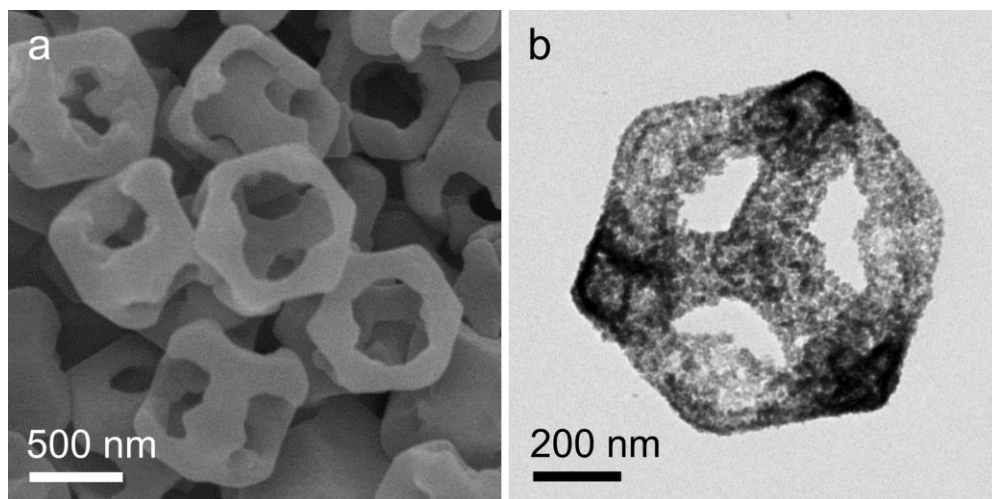

**Figure S14.** (a) SEM and (b) TEM images of ZnS derived from H-ZIF-8.

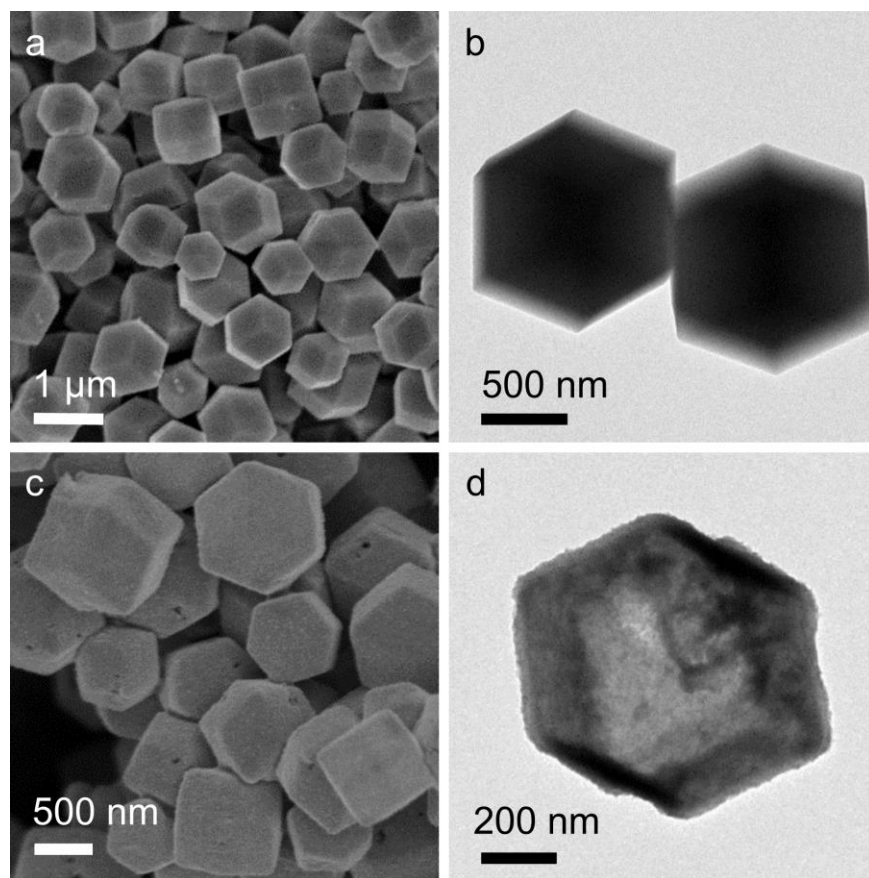

**Figure S15.** (a) SEM and (b) TEM images of ZIF-67. (c) SEM and (d) TEM images of CoS<sub>x</sub>.

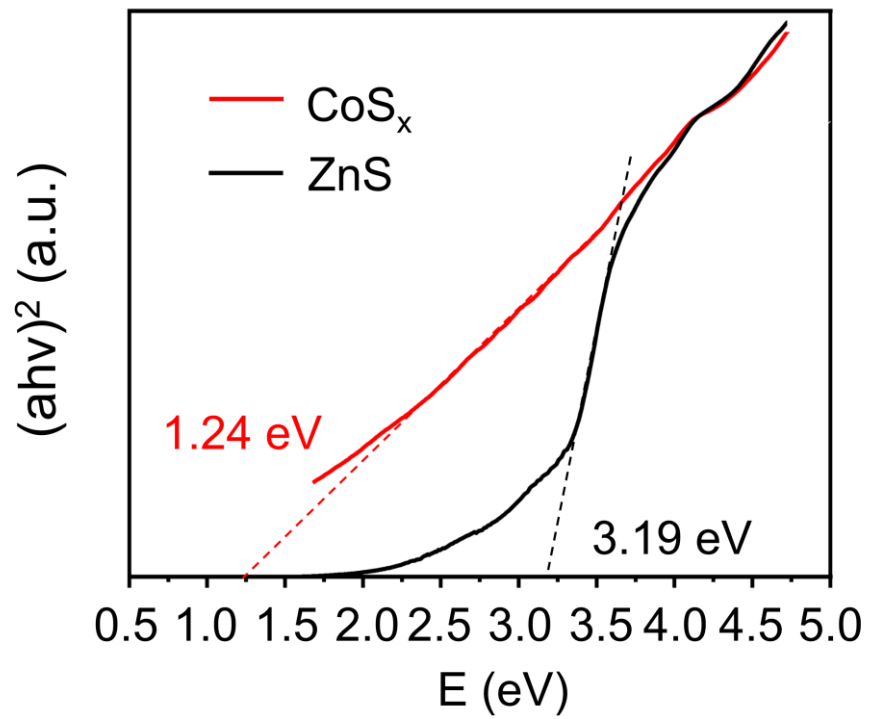

**Figure S16.** The Plot of  $(\alpha h\nu)^{1/2}$  versus photon energy of the ZnS and  $\text{CoS}_x$ .

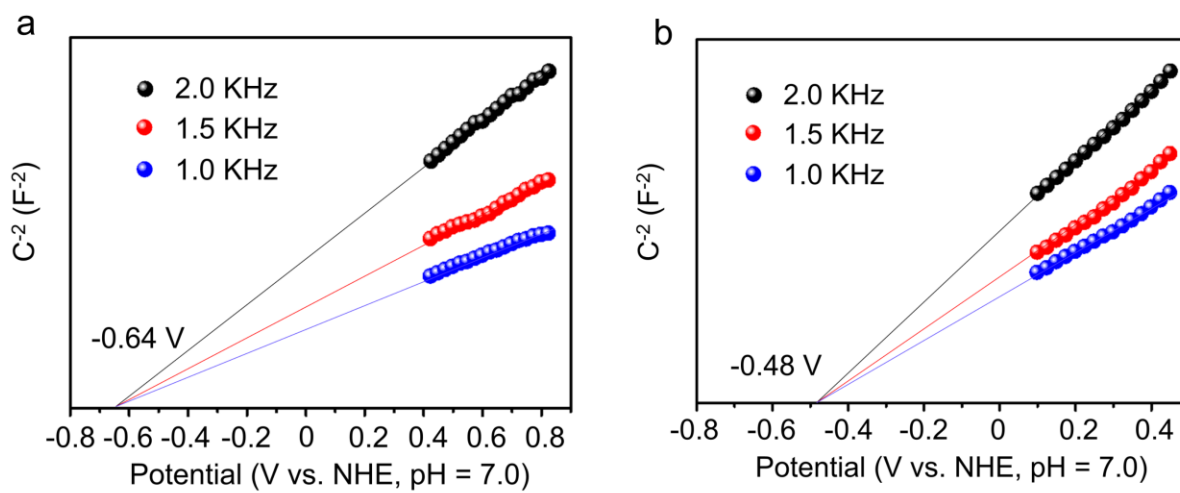

**Figure S17.** Mott–Schottky plots of (c) ZnS and (d)  $CoS_x$ .

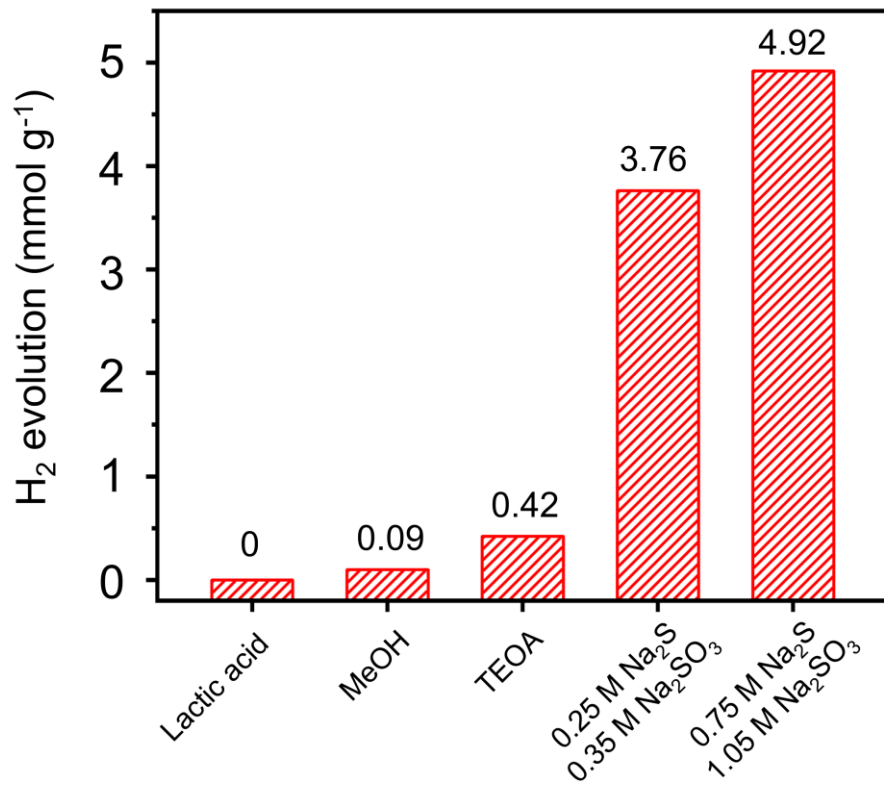

**Figure S18.** Photocatalytic H<sub>2</sub> evolution on CoS<sub>x</sub>-ZnS-3.5 with different sacrificial reagents.

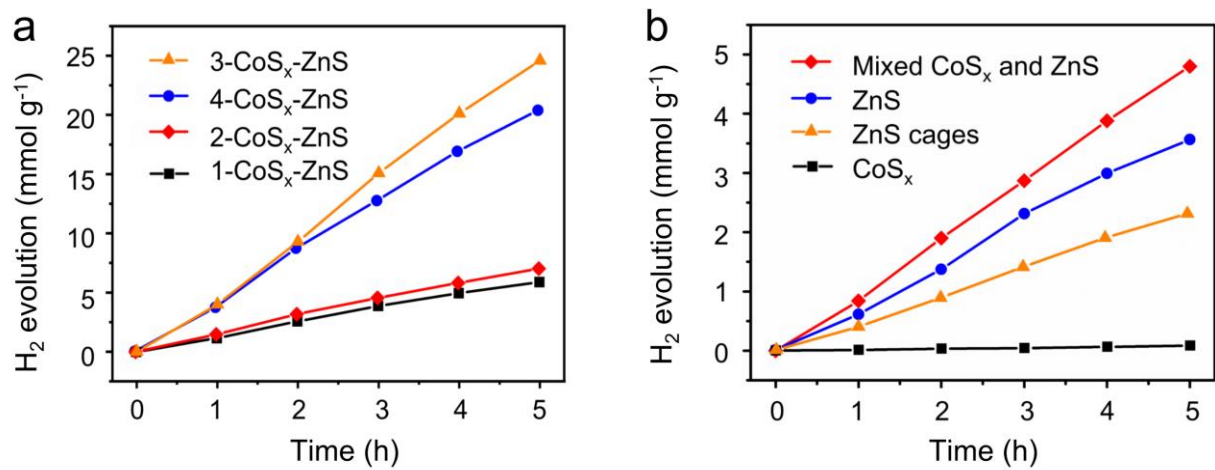

**Figure S19.** Photocatalytic hydrogen evolution curves of different samples.



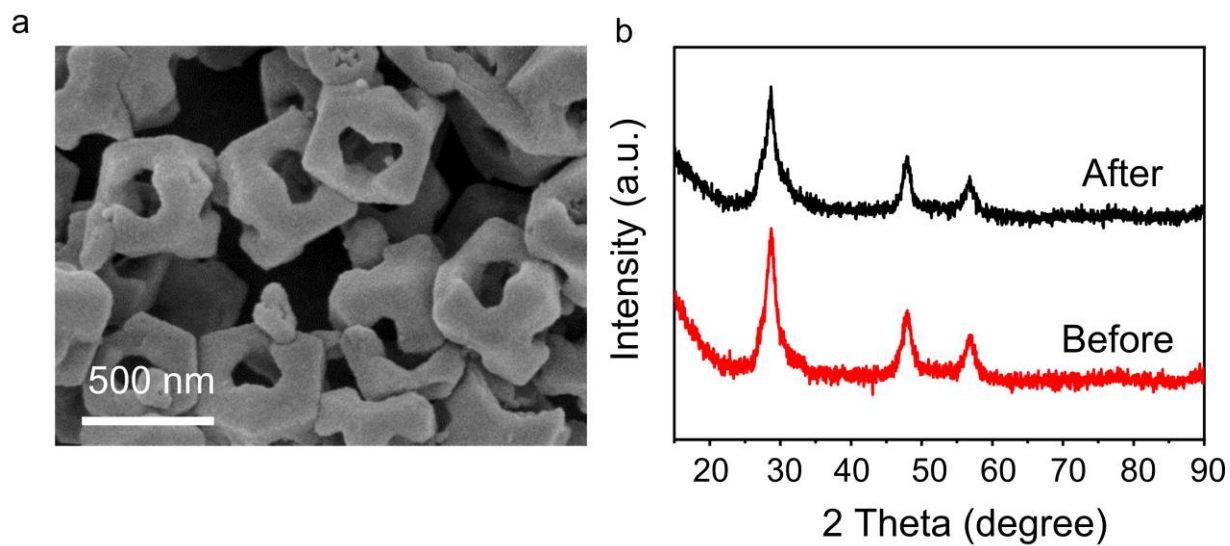

**Figure S20.** (a) SEM image of  $\text{CoS}_x\text{-ZnS-3.5}$  after reaction. (b) XRD patterns of  $\text{CoS}_x\text{-ZnS-3.5}$  before and after recycle test.

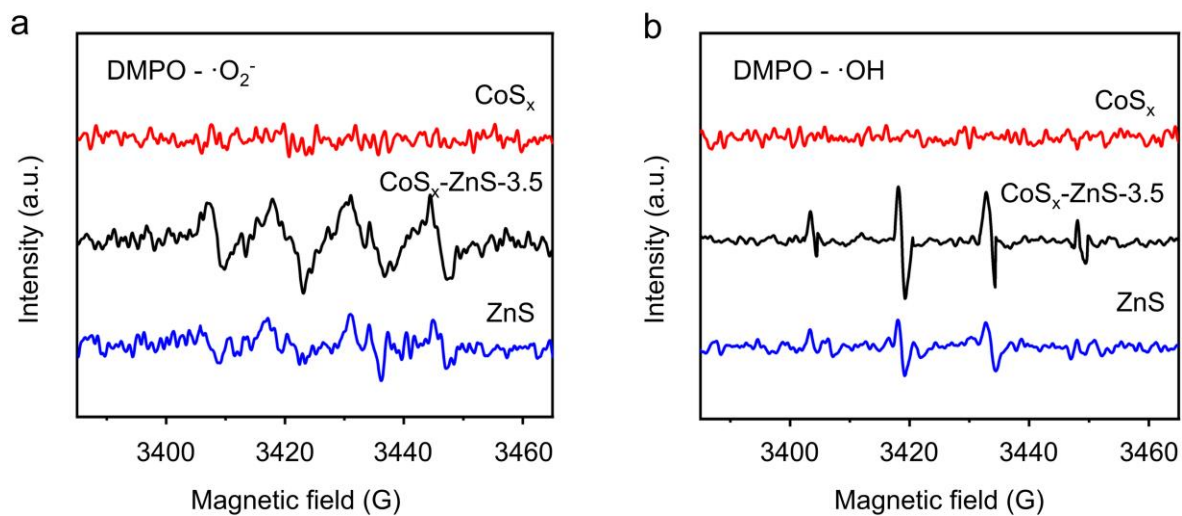

**Figure S21.** (a) EPR signals of DMPO-·O<sub>2</sub><sup>-</sup> in methanol dispersion and (b) EPR signals of DMPO-·OH in aqueous suspension of ZnS, CoS<sub>x</sub> and CoS<sub>x</sub>-ZnS-3.5. The EPR characterization was performed and the signals were collected after the illumination by Xenon lamp for 3 min.

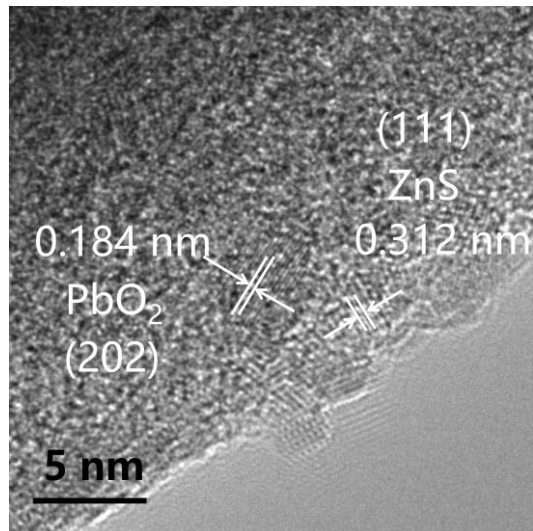

**Figure S22.** TEM image of CoS<sub>x</sub>-ZnS-3.5 photo-deposited with PbO<sub>2</sub> nanoparticles.

**Table S1.** AAS and element analysis results of different catalysts and the corresponding BET surface areas and pore volumes.

| Catalyst                                               | Zn : Co<br>(atomic<br>ratio) <sup>a</sup> | S <sub>BET</sub><br>(m <sup>2</sup> g <sup>-1</sup> ) <sup>b</sup> | Pore<br>volume<br>(cm <sup>3</sup> g <sup>-1</sup> ) <sup>c</sup> | Content (wt%)  |                |      |                |                 |                 |
|--------------------------------------------------------|-------------------------------------------|--------------------------------------------------------------------|-------------------------------------------------------------------|----------------|----------------|------|----------------|-----------------|-----------------|
|                                                        |                                           |                                                                    |                                                                   | N <sup>d</sup> | C <sup>d</sup> | H    | S <sup>d</sup> | Zn <sup>a</sup> | Co <sup>a</sup> |
| ZnS                                                    | -                                         | 124                                                                | 0.23                                                              | 2.32           | 6.89           | 1.68 | 28.72          | 58.87           | -               |
| CoS <sub>x</sub> -ZnS-5                                | 4.95                                      | 105                                                                | 0.22                                                              | 2.12           | 7.55           | 1.53 | 30.82          | 48.01           | 8.75            |
| CoS <sub>x</sub> -ZnS-3.5<br>(3-CoS <sub>x</sub> -ZnS) | 3.43                                      | 90                                                                 | 0.18                                                              | 1.89           | 7.95           | 1.69 | 31.26          | 44.05           | 11.38           |
| CoS <sub>x</sub> -ZnS-2.5                              | 2.37                                      | 52                                                                 | 0.15                                                              | 1.81           | 7.58           | 1.24 | 33.25          | 39.81           | 15.15           |
| CoS <sub>x</sub>                                       | -                                         | 16                                                                 | 0.02                                                              | 1.72           | 8.24           | 1.62 | 35.83          | -               | 50.18           |
| 1-CoS <sub>x</sub> -ZnS                                | -                                         | 68                                                                 | 0.08                                                              | -              | -              | -    | -              | -               | -               |
| 160-CoS <sub>x</sub> -ZnS-<br>3.5                      | -                                         | 24                                                                 | 0.04                                                              | -              | -              | -    | -              | -               | -               |

<sup>a</sup> Measured by AAS. <sup>b</sup> BET surface area. <sup>c</sup> Total pore volume. <sup>d</sup> Measured by elemental analysis.

**Table S2.** Comparison of the H<sub>2</sub>-generation rates for various photocatalysts.

| Catalyst                                 | Light source                           | Sacrificial reagent                                                | HER rate<br>(mmol <sub>H<sub>2</sub></sub><br>h <sup>-1</sup> g <sup>-1</sup> ) | Ref.             |
|------------------------------------------|----------------------------------------|--------------------------------------------------------------------|---------------------------------------------------------------------------------|------------------|
| <b>CoS<sub>x</sub>-ZnS-3.5</b>           | <b>AM 1.5</b>                          | <b>Na<sub>2</sub>S-Na<sub>2</sub>SO<sub>3</sub></b>                | <b>4.92</b>                                                                     | <b>This work</b> |
| Mixed ZnS/CoS <sub>2</sub>               | 100 mW cm <sup>-2</sup><br>Xe arc lamp | Na <sub>2</sub> S-Na <sub>2</sub> SO <sub>3</sub>                  | 0.71                                                                            | 26               |
| ZnS/CoS <sub>2</sub>                     | 100 mW cm <sup>-2</sup><br>Xe arc lamp | Na <sub>2</sub> S-Na <sub>2</sub> SO <sub>3</sub>                  | 8.0                                                                             | 26               |
| ZnCdS/ZnO/ZnCdS                          | Visible light                          | Na <sub>2</sub> HPO <sub>4</sub> /NaH <sub>2</sub> PO <sub>4</sub> | 2.8                                                                             | 42               |
| ZnS-BP NPs                               | Visible light                          | Na <sub>2</sub> S-Na <sub>2</sub> SO <sub>3</sub>                  | 1.56                                                                            | S1               |
| CoS <sub>2</sub> /CdS ZnS-BP NPs         | Visible light                          | Na <sub>2</sub> S-Na <sub>2</sub> SO <sub>3</sub>                  | 1.53                                                                            | S2               |
| ZnO/ZnS                                  | Visible light                          | Na <sub>2</sub> S-Na <sub>2</sub> SO <sub>3</sub>                  | 1.35                                                                            | S3               |
| ZnS/ZnO                                  | Visible light                          | Na <sub>2</sub> S-Na <sub>2</sub> SO <sub>3</sub>                  | 1.04                                                                            | S4               |
| CuS/ZnS/CNTF                             | 300 W<br>mercury lamp                  | Na <sub>2</sub> S-Na <sub>2</sub> SO <sub>3</sub>                  | 0.96                                                                            | S5               |
| ZnS/g-C <sub>3</sub> N <sub>4</sub>      | Visible light                          | Na <sub>2</sub> S-Na <sub>2</sub> SO <sub>3</sub>                  | 0.71                                                                            | 29               |
| InP/ZnS                                  | LED light<br>source                    | H <sub>2</sub> A/NaHA                                              | 0.69                                                                            | 30               |
| ZnS/Ti <sub>2</sub> C <sub>3</sub> MXene | 300 W Xe<br>lamp                       | Na <sub>2</sub> S-Na <sub>2</sub> SO <sub>3</sub>                  | 0.5                                                                             | S6               |
| ZnS/ZIS-20                               | AM 1.5                                 | TEOA                                                               | 0.45                                                                            | S7               |
| Cu <sub>2</sub> ZnSnS <sub>4</sub> /ZnS  | 300 W Xe<br>lamp                       | Na <sub>2</sub> S-Na <sub>2</sub> SO <sub>3</sub>                  | 0.15                                                                            | S8               |

## References

1. L. Wang, Y. Hu, F. Qi, L. Ding, J. Wang, X. Zhang, Q. Liu, L. Liu, H. Sun and P. Qu, *ACS Appl. Mater. Inter.*, **2020**, 12, 8157–8167.
2. B. Q. Qiu, C. X. Li, X. Q. Shen, W. L. Wang, H. Ren, Y. Li and J. Tang, *Appl. Catal. A-Gen.*, **2020**, 592, 117377.
3. P. Madhusudan, Y. Wang, B. N. Chandrashekar, W. Wang, J. Wang, J. Miao, R. Shi, Y. Liang, G. Mi and C. Cheng, *Appl. Catal. B-Environ.*, **2019**, 253, 379–390.
4. W. Zeng, Y. Ren, Y. Zheng, A. Pan and T. Zhu, *ChemCatChem*, **2021**, 13, 564–573.
5. C. Chang, Y. Wei and W. Kuo, *Int. J. Hydrogen Energy*, **2019**, 44, 30553.
6. L. Tie, S. Yang, C. Yu, H. Chen, Y. Liu, S. Dong, J. Sun and J. Sun, *J. Colloid Interf. Sci.*, **2019**, 545, 63–70.
7. H. Song, N. Wang, H. Meng, Y. Han, J. Wu, J. Xu, Y. Xu, X. Zhang and T. Sun, *Dalton Trans.*, **2020**, 49, 10816–10823.
8. K. Wang, D. Huang, L. Yu, H. Gu, S. Ikeda and F. Jiang, *J. Colloid Interf. Sci.*, **2019**, 536, 9–16.
